# Supplementary material for: High-Pressure Crystallization of iPP Nucleated with 1,3:2,4-bis(3,4-dimethylbenzylidene)sorbitol
Source: MDPI journal article supplement (doi:10.3390/polym13010145), 2021-01-01
Supplement: s1 [file s1]

## Supplementary Material

### High pressure crystallization of iPP nucleated with 1,3:2,4-bis(3,4-dimethylbenzylidene)sorbitol

Przemyslaw Sowinski<sup>1</sup>, Ewa Piorkowska<sup>1</sup>, Severine A. E. Boyer<sup>2</sup>, Jean-Marc Haudin<sup>2</sup>

<sup>1</sup> Centre of Molecular and Macromolecular Studies, Polish Academy of Sciences, Sienkiewicza 112, 90 363, Lodz, Poland

<sup>2</sup> Centre for Material Forming, MINES ParisTech, PSL - Research University, UMR CNRS 7635, 1 Rue Claude Daunesse, 06904, Sophia Antipolis, France

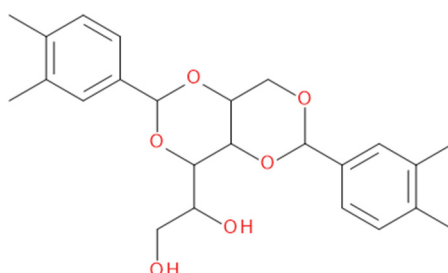

Figure S1. Chemical structure of 1,3:2,4-bis(3,4-dimethylbenzylidene)sorbitol.

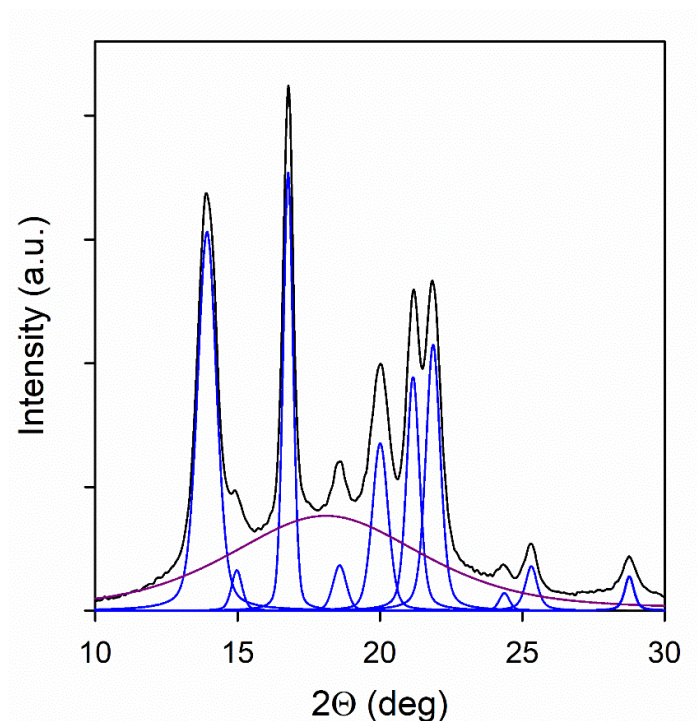

Figure S2. Example of deconvolution of the diffractogram, in  $2\theta$  range from 10 to 30°, recorded for the specimen containing both  $\alpha$  and  $\gamma$  crystallographic forms.

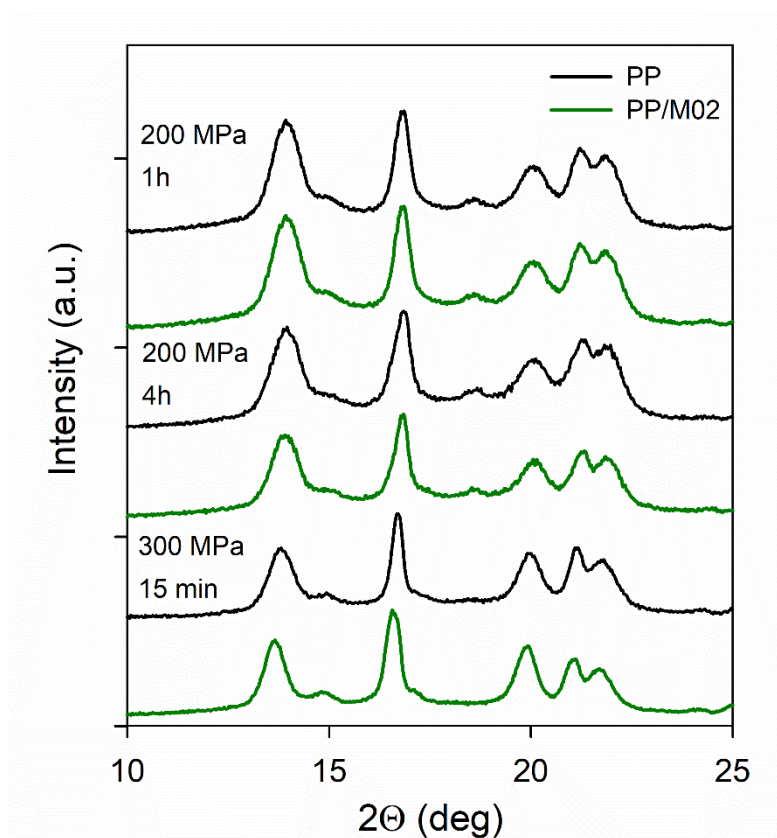

Fig. S3. X-ray diffractograms, in  $2\Theta$  range from 10 to 25°, of neat PP and PP/M02 crystallized according to protocol II.
